# Supplementary material for: Atmospheric Oxidation Mechanism and Kinetics of Indole Initiated by ·OH and ·Cl: A Computational Study
Source: Copernicus journal article supplement (doi:10.5194/acp-2022-88), 2022-04-26
Supplement: Supplementary file [file acp-2022-88-AC1-supplement.pdf]

Table 3. Calculated branching ratios ( $I$ ) at 298 K and over the pressure range from 0.1 to 1.0 atm of the main reaction pathways for the indole +  $\cdot\text{OH}/\cdot\text{Cl}$  reactions

| Species                         | $I$     |         |         |         |
|---------------------------------|---------|---------|---------|---------|
|                                 | 0.1 atm | 0.4 atm | 0.7 atm | 1.0 atm |
| IM <sub>1-7</sub>               | 77.4%   | 77.4%   | 77.4%   | 77.4%   |
| IM <sub>2-5</sub>               | 31.4%   | 31.4%   | 31.4%   | 31.4%   |
| IM <sub>2-6</sub>               | 45.5%   | 45.5%   | 45.5%   | 45.5%   |
| P <sub>2-10</sub>               | 23.1%   | 23.1%   | 23.1%   | 23.1%   |
| P <sub>1-7-4-1</sub>            | 6.6%    | 6.5%    | 6.5%    | 6.5%    |
| NO-P <sub>3</sub>               | 67.3%   | 67.3%   | 67.3%   | 67.3%   |
| HO <sub>2</sub> -P <sub>3</sub> | 24.9%   | 24.9%   | 24.9%   | 24.9%   |
| NO-P <sub>4</sub>               | 72.4%   | 72.4%   | 72.4%   | 72.4%   |
| HO <sub>2</sub> -P <sub>4</sub> | 26.8%   | 26.8%   | 26.8%   | 26.8%   |
| NO-P <sub>5</sub>               | 72.7%   | 72.7%   | 72.7%   | 72.7%   |
| HO <sub>2</sub> -P <sub>5</sub> | 26.9%   | 26.9%   | 26.9%   | 26.9%   |
| NO-P <sub>6</sub>               | 73.0%   | 73.0%   | 73.0%   | 73.0%   |
| HO <sub>2</sub> -P <sub>6</sub> | 27.0%   | 27.0%   | 27.0%   | 27.0%   |

Table 4. Calculated branching ratios ( $I$ ) at 298 K and over the energy transfer parameters from 50 to 250 cm<sup>-1</sup> of the main reaction pathways for the indole +  $\cdot\text{OH}/\cdot\text{Cl}$  reactions

| Species                         | $I$                               |                                    |                                    |                                    |                                    |
|---------------------------------|-----------------------------------|------------------------------------|------------------------------------|------------------------------------|------------------------------------|
|                                 | $\Delta E_d = 50 \text{ cm}^{-1}$ | $\Delta E_d = 100 \text{ cm}^{-1}$ | $\Delta E_d = 150 \text{ cm}^{-1}$ | $\Delta E_d = 200 \text{ cm}^{-1}$ | $\Delta E_d = 250 \text{ cm}^{-1}$ |
| IM <sub>1-7</sub>               | 77.4%                             | 77.4%                              | 77.4%                              | 77.4%                              | 77.4%                              |
| IM <sub>2-5</sub>               | 31.4%                             | 31.4%                              | 31.4%                              | 31.4%                              | 31.4%                              |
| IM <sub>2-6</sub>               | 45.5%                             | 45.5%                              | 45.5%                              | 45.5%                              | 45.5%                              |
| P <sub>2-10</sub>               | 23.1%                             | 23.1%                              | 23.1%                              | 23.1%                              | 23.1%                              |
| P <sub>1-7-4-1</sub>            | 6.5%                              | 6.5%                               | 6.5%                               | 6.5%                               | 6.5%                               |
| NO-P <sub>3</sub>               | 67.3%                             | 67.3%                              | 67.3%                              | 67.3%                              | 67.3%                              |
| HO <sub>2</sub> -P <sub>3</sub> | 24.9%                             | 24.9%                              | 24.9%                              | 24.9%                              | 24.9%                              |
| NO-P <sub>4</sub>               | 72.4%                             | 72.4%                              | 72.4%                              | 72.4%                              | 72.4%                              |
| HO <sub>2</sub> -P <sub>4</sub> | 26.8%                             | 26.8%                              | 26.8%                              | 26.8%                              | 26.8%                              |
| NO-P <sub>5</sub>               | 72.7%                             | 72.7%                              | 72.7%                              | 72.7%                              | 72.7%                              |
| HO <sub>2</sub> -P <sub>5</sub> | 26.9%                             | 26.9%                              | 26.9%                              | 26.9%                              | 26.9%                              |
| NO-P <sub>6</sub>               | 73.0%                             | 73.0%                              | 73.0%                              | 73.0%                              | 73.0%                              |
| HO <sub>2</sub> -P <sub>6</sub> | 27.0%                             | 27.0%                              | 27.0%                              | 27.0%                              | 27.0%                              |
